# Supplementary material for: How important is income in explaining individuals having forgone healthcare due to cost-sharing payments? Results from a mixed methods sequential explanatory study
Source: Springer Nature journal article supplement (doi:10.1186/s12913-022-07527-z), 2022-02-15
Supplement: MOESM1 [file 20135056]

# Additional file 1

## Interview guide

### 1. **Introduction** (prior to the start of the tape)

- a. Introduce the research project, the aim and the background of the study.  
Describe briefly your involvement and interest in research.
- b. Explain the conditions of the interview (oral and written information).
- c. If the interviewee has no further questions regarding the conditions, let him or her sign the informed consent.
- d. Start the tape.**

### 2. Have you ever not used GP care (due to costs)?

*Prompts:*

- a. Reasons for not using the healthcare (deductible, costs, time, travel time, work, fear, complications, relationship with GP/physician)
- b. Perceived expected health benefits
- c. Experience regarding not using the healthcare (in hindsight, would you do it again?)

### 3. Have you ever not used prescribed medication (due to costs)?

*In addition to the prompts listed under 2):*

- a. Information on cost-sharing requirements (e.g., copayments) in advance

- b. Adverse effects of medication
  - c. Fear of antibiotics-resistant
  - d. Fear of addiction to pain-medication
4. Have you ever not used ordered diagnostic tests (due to costs)?
- In addition to the prompts listed under 2) and 3):*
- a. Fear of the diagnosis of cancer
  - b. Travel time and parking costs/availability
5. Have you ever not used referred specialist care (due to costs)?
- In addition to the prompts listed under 2) to 4):*
- a. Information on coverage and costs of tertiary healthcare (specialized center) by his/her insurance plan
6. Have you ever not used referred long-term care or home care (due to costs)?
- In addition to the prompts listed under 2) to 5):*
- a. Needs assessment by the governmental Care Needs Assessment Centre.
7. Last question: Are there any aspects you feel are important but we have not talked about yet?
8. Thank the interviewee and **stop the tape**.
