# Supplementary material for: How important is income in explaining individuals having forgone healthcare due to cost-sharing payments? Results from a mixed methods sequential explanatory study
Source: Springer Nature journal article supplement (doi:10.1186/s12913-022-07527-z), 2022-02-15
Supplement: MOESM2 [file 20135056]

1 **Additional file 2**

2 **Study population, additional tables**

3 Relative to the total sample (n=7339), the distributions of patient characteristics between individuals “*having utilized*  
4 *healthcare*” and “*having forgone healthcare*” did not differ across the sample as stratified by type of health care service  
5 (Supplementary Table 1).

6

7 Supplementary Table 1. Study population, stratified by healthcare service

| Healthcare service:      |                            | Prescribed medications                   |                                        | Ordered diagnostic tests                 |                                        | Specialist care                          |                                        |
|--------------------------|----------------------------|------------------------------------------|----------------------------------------|------------------------------------------|----------------------------------------|------------------------------------------|----------------------------------------|
| Group:                   |                            | “Having utilized healthcare”<br>(n=5537) | “Having forgone healthcare”<br>(n=475) | “Having utilized healthcare”<br>(n=4189) | “Having forgone healthcare”<br>(n=738) | “Having utilized healthcare”<br>(n=3603) | “Having forgone healthcare”<br>(n=662) |
| Age (in years)           | Mean (sd)                  | 63.1 (10.8)                              | 57.6 (10.9)                            | 62.9 (10.8)                              | 57.6 (10.7)                            | 63.0 (10.7)                              | 58.0 (10.9)                            |
| Gender (%)               | Male                       | 49.7                                     | 42.3                                   | 47.8                                     | 40.1                                   | 48.8                                     | 39.6                                   |
|                          | Female                     | 50.3                                     | 57.7                                   | 52.2                                     | 59.9                                   | 51.2                                     | 60.4                                   |
| Household situation (%)  | Living alone               | 71.4                                     | 59.4                                   | 72.3                                     | 60.4                                   | 72.2                                     | 60.6                                   |
|                          | Married or living together | 27.1                                     | 38.1                                   | 26.3                                     | 36.9                                   | 26.4                                     | 36.5                                   |
|                          | Missing                    | 1.5                                      | 2.5                                    | 1.4                                      | 2.7                                    | 1.4                                      | 2.9                                    |
| Self-reported health (%) | (Very) poor                | 18.7                                     | 31.8                                   | 18.2                                     | 19.9                                   | 19.5                                     | 22.8                                   |
|                          | Moderate                   | 41.7                                     | 45.5                                   | 40.8                                     | 48.5                                   | 42.3                                     | 47.1                                   |
|                          | (Very) good                | 39.6                                     | 22.7                                   | 41.0                                     | 31.6                                   | 38.2                                     | 30.1                                   |
| Chronic conditions (%)   | None                       | 13.9                                     | 12.8                                   | 15.4                                     | 20.1                                   | 13.9                                     | 19.2                                   |
|                          | One or more                | 86.1                                     | 87.2                                   | 84.6                                     | 79.9                                   | 86.1                                     | 80.8                                   |
| Education level (%)      | Low                        | 22.7                                     | 28.5                                   | 22.1                                     | 25.6                                   | 21.7                                     | 26.1                                   |
|                          | Moderate                   | 30.4                                     | 34.5                                   | 30.3                                     | 34.1                                   | 30.3                                     | 33.2                                   |
|                          | High                       | 42.8                                     | 33.2                                   | 43.7                                     | 36.4                                   | 44.1                                     | 36.2                                   |
|                          | Missing                    | 4.1                                      | 3.8                                    | 3.9                                      | 3.9                                    | 3.9                                      | 4.5                                    |

8

9

10 Supplementary Table 1. (continued)

| Healthcare service:<br>Group:           |                                  | Prescribed medications                   |                                        | Ordered diagnostic tests                 |                                        | Specialist care                          |                                        |
|-----------------------------------------|----------------------------------|------------------------------------------|----------------------------------------|------------------------------------------|----------------------------------------|------------------------------------------|----------------------------------------|
|                                         |                                  | “Having utilized healthcare”<br>(n=5537) | “Having forgone healthcare”<br>(n=475) | “Having utilized healthcare”<br>(n=4189) | “Having forgone healthcare”<br>(n=738) | “Having utilized healthcare”<br>(n=3603) | “Having forgone healthcare”<br>(n=662) |
| Sense of mastery (Pearlin’s scale)<br>A | Mean (sd)                        | 22.6 (5.7)                               | 19.5 (5.9)                             | 22.8 (5.8)                               | 20.6 (5.9)                             | 22.4 (5.8)                               | 20.2 (5.9)                             |
| Monthly net income (%)                  | < €2000                          | 34.3                                     | 68.7                                   | 34.5                                     | 64.1                                   | 34.9                                     | 65.4                                   |
|                                         | €2001-€3000                      | 26.5                                     | 14.5                                   | 26.2                                     | 14.1                                   | 26.0                                     | 14.8                                   |
|                                         | €3001-€4000                      | 13.9                                     | 3.8                                    | 13.8                                     | 5.6                                    | 13.8                                     | 4.5                                    |
|                                         | >€4000€                          | 7.5                                      | 0.8                                    | 7.8                                      | 2.4                                    | 7.9                                      | 2.0                                    |
|                                         | Not-disclosed                    | 17.8                                     | 12.2                                   | 17.7                                     | 13.8                                   | 17.4                                     | 13.3                                   |
| Financial leeway (%)                    | Incurring debts or using savings | 19.6                                     | 52.6                                   | 19.4                                     | 43.9                                   | 20.6                                     | 46.5                                   |
|                                         | Just enough to live on           | 32.4                                     | 34.3                                   | 31.5                                     | 35.0                                   | 32.3                                     | 36.4                                   |
|                                         | Saving money                     | 46.3                                     | 12.0                                   | 47.4                                     | 19.5                                   | 45.3                                     | 16.0                                   |
|                                         | Not-disclosed                    | 1.7                                      | 1.1                                    | 1.7                                      | 1.6                                    | 1.8                                      | 1.1                                    |

11 A = measured by the Pearlin Mastery Scale Test in which the lowest possible summed score of 7 reflected a lacking sense of mastery, while the highest possible  
12 score of 35 reflected a complete sense of mastery [1].

13 SD = Standard deviation.

14

15 On average and relative to the total Dutch population, our sample was older, consisted of more females and had attained a  
 16 higher educational level. No population data was available for other relevant characteristics such as health and sense of  
 17 mastery (Supplementary Table 2).

18

19 Supplementary Table 2. Study population compared to the total Dutch population

| Group:              |                    | Total sample<br>(n=7339) | Total Dutch<br>population <sup>A</sup> |
|---------------------|--------------------|--------------------------|----------------------------------------|
| Age (%)             | 18-49 years        | 15.3                     | 50.7                                   |
|                     | 50-64 years        | 39.5                     | 26.2                                   |
|                     | 65 years and older | 45.2                     | 23.1                                   |
| Gender (%)          | Male               | 47.7                     | 49.6                                   |
|                     | Female             | 52.3                     | 50.4                                   |
| Education level (%) | Low                | 23.3                     | 32.3                                   |
|                     | Moderate           | 30.8                     | 37.7                                   |
|                     | High               | 41.7                     | 28.6                                   |
|                     | Missing            | 4.2                      | 1.4                                    |

20 *A = source [2].*

21

## 22 **References**

- 23 1. Pearlin LI, Menaghan EG, Lieberman MA, Mullan JT: **The stress process**. *J Health Soc Behav* 1981:337-356.  
24 doi:10.2307/2136676
- 25 2. Statistics Netherlands: **StatLine**. <https://opendata.cbs.nl/statline/#/CBS/nl/> (2021). Accessed July, 2021  
26
