# Supplementary material for: How important is income in explaining individuals having forgone healthcare due to cost-sharing payments? Results from a mixed methods sequential explanatory study
Source: Springer Nature journal article supplement (doi:10.1186/s12913-022-07527-z), 2022-02-15
Supplement: MOESM3 [file 20135056]

# 1 Additional file 3

## 2 Results of stratified models

3 Results of regression models stratified by type of healthcare service (Supplementary  
 4 Table 3) were similar to those of the main model with one exception. Self-reported health  
 5 was significant in the main model, while this was not the case in the model for the  
 6 prescribed medication. In addition, results of corresponding dominance analyses  
 7 (Supplementary Figures 1-3) were similar to those of the main model: a similar  
 8 contribution in the model's overall  $R^2_{mf}$  was observed for the four most important  
 9 determinants, i.e., financial leeway, income, age and sense of mastery.

10  
 11 Supplementary Table 3. Results of logistic regression models, stratified by type of  
 12 healthcare service

| Healthcare service:      |                            | Prescribed medications<br>OR (95%CI) <sup>C</sup> | Ordered diagnostic tests<br>OR (95%CI) <sup>C</sup> | Specialist care<br>OR (95%CI) <sup>C</sup> |
|--------------------------|----------------------------|---------------------------------------------------|-----------------------------------------------------|--------------------------------------------|
| <i>Variables</i>         |                            |                                                   |                                                     |                                            |
| Intercept                |                            | 0.43 (0.27-0.68)                                  | 0.48 (0.32-0.71)                                    | 0.63 (0.42-0.98)                           |
| Age (years) <sup>A</sup> | <i>Mean centered</i>       | 0.96 (0.96-0.97)                                  | 0.96 (0.95-0.97)                                    | 0.96 (0.96-0.97)                           |
| Gender                   | Male (reference)           |                                                   |                                                     |                                            |
|                          | Female                     | 0.89 (0.72-1.10)                                  | 0.92 (0.77-1.09)                                    | 0.97 (0.81-1.18)                           |
| Household situation      | Living alone (reference)   |                                                   |                                                     |                                            |
|                          | Married or living together | 0.91 (0.73-1.13)                                  | 1.01 (0.83-1.22)                                    | 0.97 (0.78-1.19)                           |
|                          | Missing                    | 0.99 (0.44-1.83)                                  | 1.10 (0.55-1.94)                                    | 1.29 (0.64-2.35)                           |
| Self-reported health     | (Very) poor (reference)    |                                                   |                                                     |                                            |
|                          | Moderate                   | 1.09 (0.85-1.41)                                  | 1.85 (1.45-2.37)                                    | 1.58 (1.23-2.03)                           |
|                          | (Very) good                | 0.85 (0.60-1.20)                                  | 1.58 (1.17-2.16)                                    | 1.48 (1.07-2.06)                           |

13 Supplementary Table 3. (continued)

| Healthcare service:                             |                                              | Prescribed medications<br>OR (95%CI) <sup>C</sup> | Ordered diagnostic tests<br>OR (95%CI) <sup>C</sup> | Specialist care<br>OR (95%CI) <sup>C</sup> |
|-------------------------------------------------|----------------------------------------------|---------------------------------------------------|-----------------------------------------------------|--------------------------------------------|
| Chronic conditions                              | None (reference)                             |                                                   |                                                     |                                            |
|                                                 | One or more                                  | 0.55 (0.40-0.79)                                  | 0.51 (0.40-0.65)                                    | 0.44 (0.34-0.59)                           |
| Education level                                 | Low (reference)                              |                                                   |                                                     |                                            |
|                                                 | Moderate                                     | 0.96 (0.74-1.23)                                  | 0.99 (0.78-1.24)                                    | 0.93 (0.75-1.18)                           |
|                                                 | High                                         | 1.12 (0.85-1.51)                                  | 1.16 (0.93-1.44)                                    | 1.17 (0.93-1.50)                           |
|                                                 | Missing                                      | 0.93 (0.52-1.57)                                  | 1.09 (0.67-1.65)                                    | 1.22 (0.74-1.83)                           |
| Sense of mastery (Pearlin's scale) <sup>B</sup> | <i>Mean centered</i>                         | 0.95 (0.93-0.97)                                  | 0.95 (0.94-0.97)                                    | 0.95 (0.93-0.97)                           |
| Monthly net income                              | < €2000 (reference)                          |                                                   |                                                     |                                            |
|                                                 | €2001-€3000                                  | 0.47 (0.34-0.62)                                  | 0.44 (0.34-0.56)                                    | 0.45 (0.35-0.58)                           |
|                                                 | €3001-€4000                                  | 0.31 (0.16-0.47)                                  | 0.36 (0.23-0.50)                                    | 0.31 (0.19-0.46)                           |
|                                                 | >€4000€                                      | 0.15 (0.03-0.35)                                  | 0.33 (0.16-0.50)                                    | 0.27 (0.12-0.46)                           |
|                                                 | Not-disclosed                                | 0.50 (0.36-0.66)                                  | 0.53 (0.40-0.68)                                    | 0.52 (0.39-0.69)                           |
| Financial leeway                                | Incurring debts or using savings (reference) |                                                   |                                                     |                                            |
|                                                 | Just enough to live on                       | 0.47 (0.38-0.58)                                  | 0.56 (0.46-0.68)                                    | 0.56 (0.46-0.69)                           |
|                                                 | Saving money                                 | 0.19 (0.14-0.26)                                  | 0.30 (0.23-0.38)                                    | 0.26 (0.20-0.34)                           |
|                                                 | Not-disclosed                                | 0.35 (0.07-0.74)                                  | 0.59 (0.27-1.10)                                    | 0.36 (0.11-0.70)                           |
| N of observations                               |                                              | 6012                                              | 4927                                                | 4265                                       |
| Model fit                                       | Overall R <sub>2mf</sub>                     | 0.15                                              | 0.13                                                | 0.14                                       |

14 Dependent variable: "the occurrence of prescribed medication / ordered diagnostic tests / referred specialist care  
15 forgone due to the deductible". A = centered at the total sample's mean age: 62.2 years (sd: 11.1). B = centered at the  
16 total sample's mean score: 22.3 (standard deviation: 5.8). C = reflects bootstrapped confidence intervals.  
17 OR = Odds ratio. R<sub>2mf</sub> = McFadden's pseudo R<sup>2</sup>. 95%CI = 95% Confidence Intervals (lower bound-upper bound).

18

19 Supplementary Fig. 1 Results of dominance analysis (prescribed medications). Values  
20 reflect the bootstrapped units of McFadden's pseudo R2 of each determinant and its  
21 relative contribution to the model's overall value.

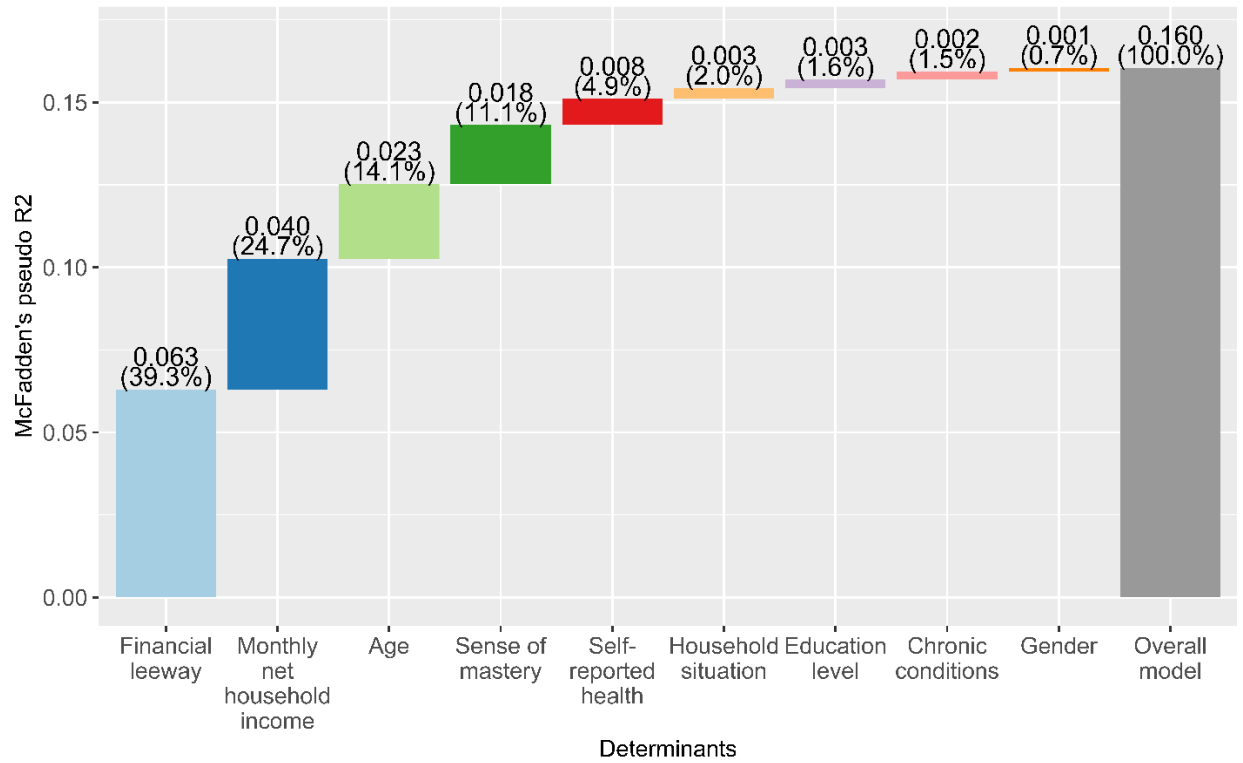

22

23

24 Supplementary Fig. 2. Results of dominance analysis (ordered diagnostic tests). Values  
25 reflect the bootstrapped units of McFadden's pseudo R2 of each determinant and its  
26 relative contribution to the model's overall value.

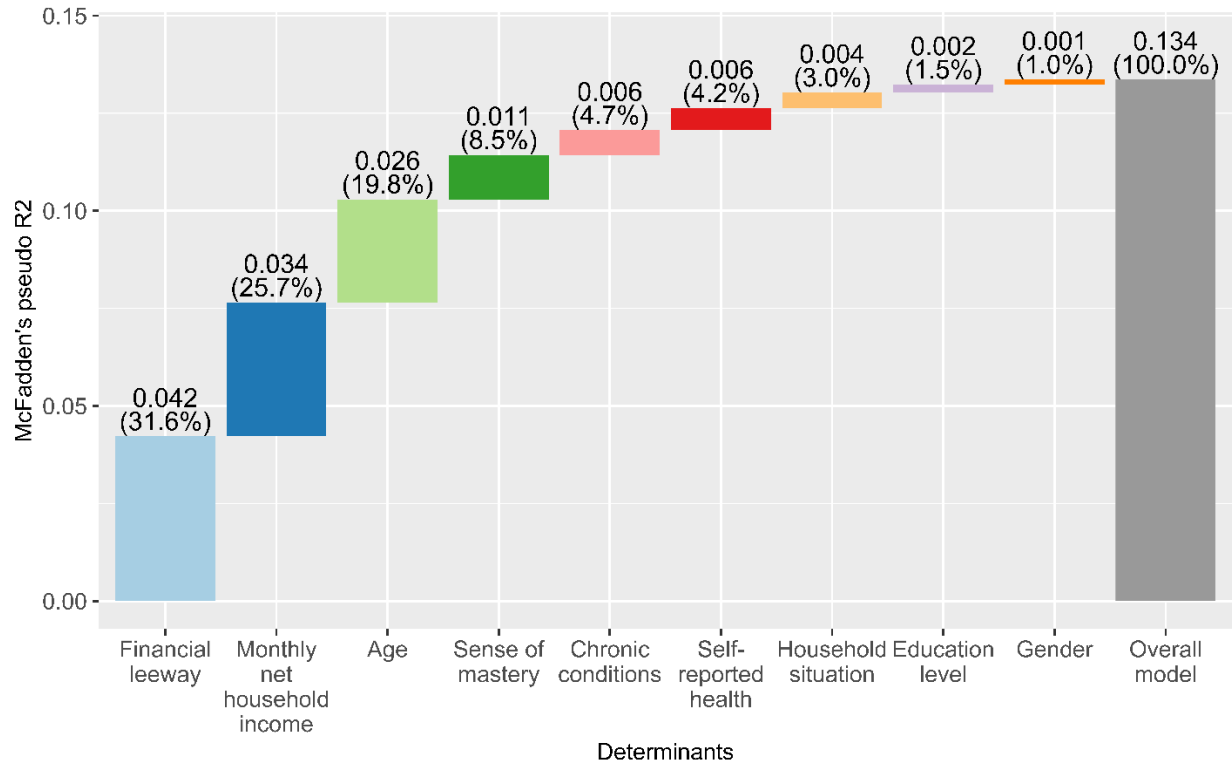

27

28

29 Supplementary Fig. 3. Results of dominance analysis (specialist care). Values reflect the  
30 bootstrapped units of McFadden's pseudo R2 of each determinant and its relative  
31 contribution to the model's overall value.

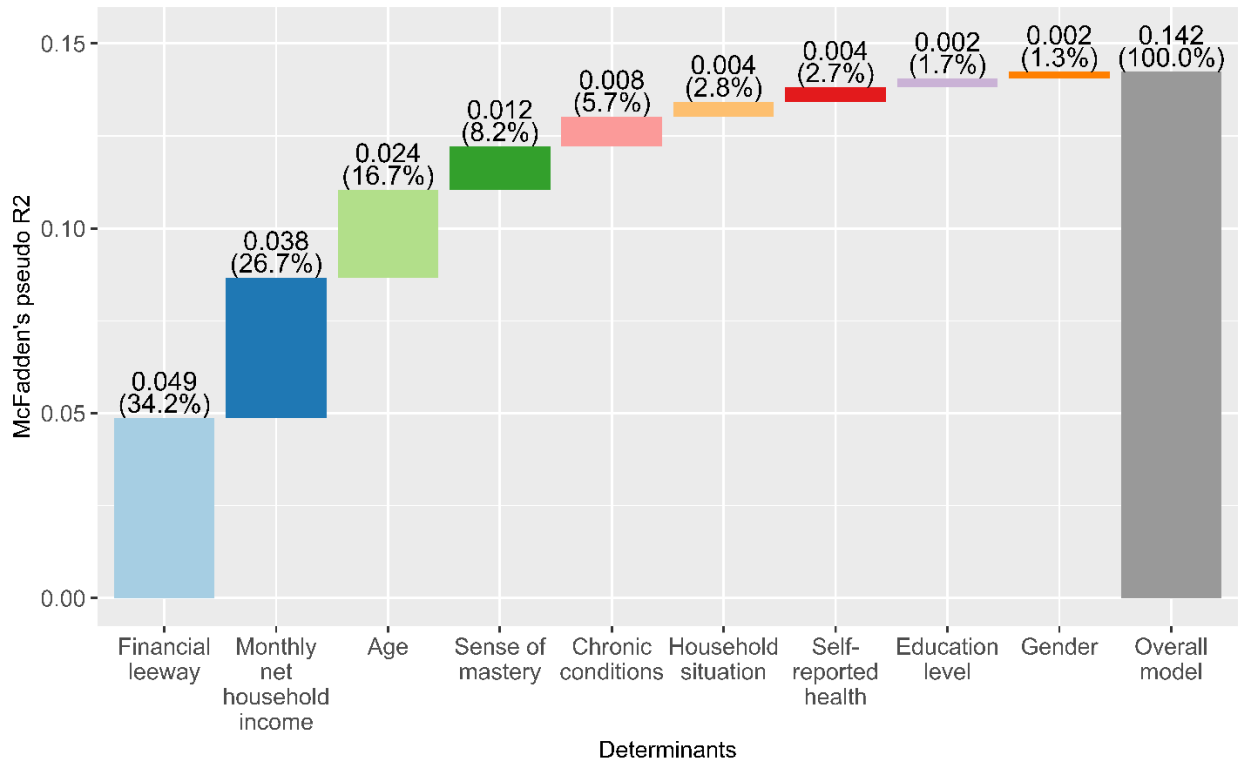

32

33

34 **Results of population weighted (IPW) models**

35 Results of population weighted regression model (Supplementary Table 4) resembled  
 36 those of the main model except for self-reported health. Self-reported health was  
 37 significant in the main model, while this was not the case in the model for the prescribed  
 38 medication. In addition, results of corresponding dominance analysis (Supplementary  
 39 Figure 4) were similar to those of the main model: a similar contribution in the model's  
 40 overall  $R^2_{mf}$  was observed for the four most important determinants, i.e., financial leeway,  
 41 income, age and sense of mastery.

42

43 Supplementary Table 4. Results of IPW logistic regression model

| Analysis:                   |                                 | Population weighted logistic regression model<br>OR (95%CI) <sup>c</sup> |
|-----------------------------|---------------------------------|--------------------------------------------------------------------------|
| <i>Variables</i>            |                                 |                                                                          |
| Intercept                   |                                 | 0.55 (0.34-0.88)                                                         |
| Age (in years) <sup>A</sup> | <i>Mean centered</i>            | 0.97 (0.96-0.98)                                                         |
| Gender                      | <i>Male (reference)</i>         |                                                                          |
|                             | Female                          | 1.05 (0.85-1.32)                                                         |
| Household situation         | <i>Living alone (reference)</i> |                                                                          |
|                             | Married or living together      | 0.88 (0.70-1.13)                                                         |
|                             | Missing                         | 0.81 (0.39-1.60)                                                         |
| Self-reported health        | <i>(Very) poor (reference)</i>  |                                                                          |
|                             | Moderate                        | 1.26 (0.97-1.65)                                                         |
|                             | (Very) good                     | 1.18 (0.82-1.67)                                                         |
| Chronic conditions          | <i>None (reference)</i>         |                                                                          |
|                             | One or more                     | 0.59 (0.42-0.82)                                                         |
| Education level             | <i>Low (reference)</i>          |                                                                          |
|                             | Moderate                        | 0.97 (0.76-1.24)                                                         |
|                             | High                            | 1.17 (0.88-1.52)                                                         |
|                             | Missing                         | 1.29 (0.65-2.31)                                                         |

44

45 Supplementary Table 4. (continued)

| Analysis:                                       |                                                       | Population weighted logistic regression model<br>OR (95%CI) <sup>C</sup> |
|-------------------------------------------------|-------------------------------------------------------|--------------------------------------------------------------------------|
| Sense of mastery (Pearlin's scale) <sup>B</sup> | <i>Mean centered</i>                                  | 0.97 (0.95-0.99)                                                         |
| Monthly net household income                    | < €2000 ( <i>reference</i> )                          |                                                                          |
|                                                 | €2001-€3000                                           | 0.44 (0.33-0.58)                                                         |
|                                                 | €3001-€4000                                           | 0.38 (0.22-0.60)                                                         |
|                                                 | >€4000                                                | 0.30 (0.13-0.55)                                                         |
|                                                 | Not-disclosed                                         | 0.57 (0.41-0.76)                                                         |
| Financial leeway                                | Incurring debts or using savings ( <i>reference</i> ) |                                                                          |
|                                                 | Just enough to live on                                | 0.52 (0.41-0.65)                                                         |
|                                                 | Saving money                                          | 0.28 (0.20-0.37)                                                         |
|                                                 | Not-disclosed                                         | 0.42 (0.16-0.85)                                                         |
| N of observations                               |                                                       | 7339                                                                     |
| Model fit                                       | Overall R <sup>2</sup> <sub>mf</sub>                  | 0.11                                                                     |

46 *Dependent variable: "the occurrence of recommended healthcare forgone due to the deductible", i.e., forgone either*  
 47 *prescribed medications, ordered diagnostic tests or specialist care due to the deductible. A = centered at the total*  
 48 *sample's mean age: 62.2 years (standard deviation: 11.1). B = centered at the total sample's mean score: 22.3 (standard*  
 49 *deviation: 5.8). C = reflects bootstrapped confidence intervals.*

50 *OR = Odds ratio. R<sup>2</sup><sub>mf</sub> = McFadden's pseudo R<sup>2</sup>. 95%CI = 95% Confidence Intervals (lower bound – upper bound).*

51 *IPW = Inversed probability weighted.*

52

53 Supplementary Fig. 4. Results of dominance analysis (IPW). Values reflect the  
54 bootstrapped units of McFadden's pseudo R2 of each determinant and its relative  
55 contribution to the model's overall value.

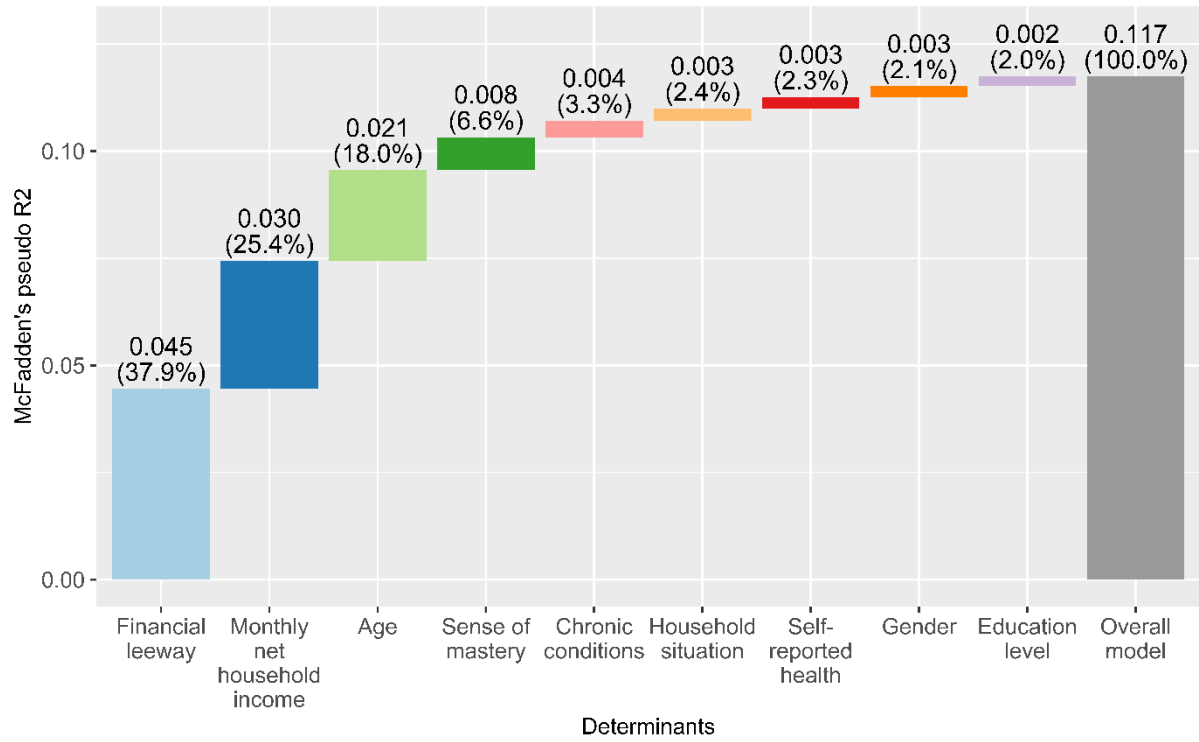

56

57
